# Supplementary material for: Olfactory Specialization in Drosophila suzukii Supports an Ecological Shift in Host Preference from Rotten to Fresh Fruit
Source: PubMed Central journal article supplement (PMC4351439; doi:10.1007/s10886-015-0544-3), 2015-01-25

# A ab2B

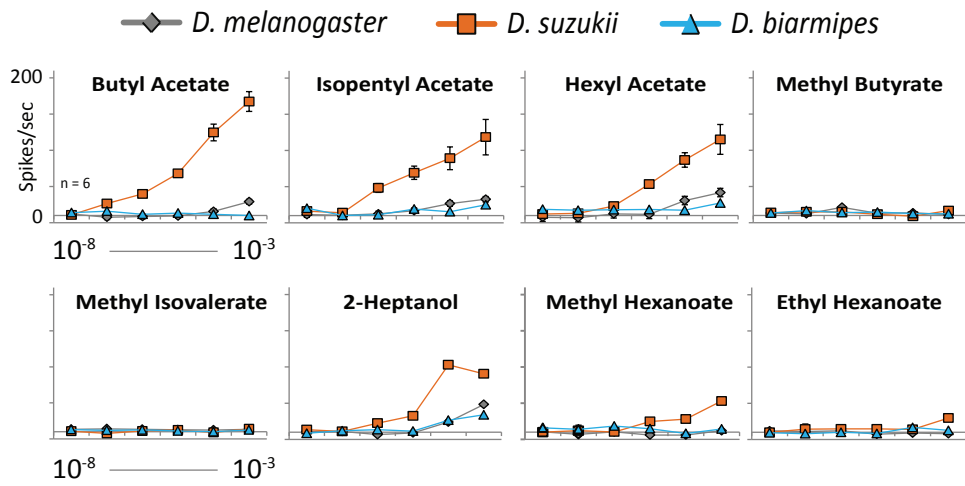

# B GC-SSR (ab2)

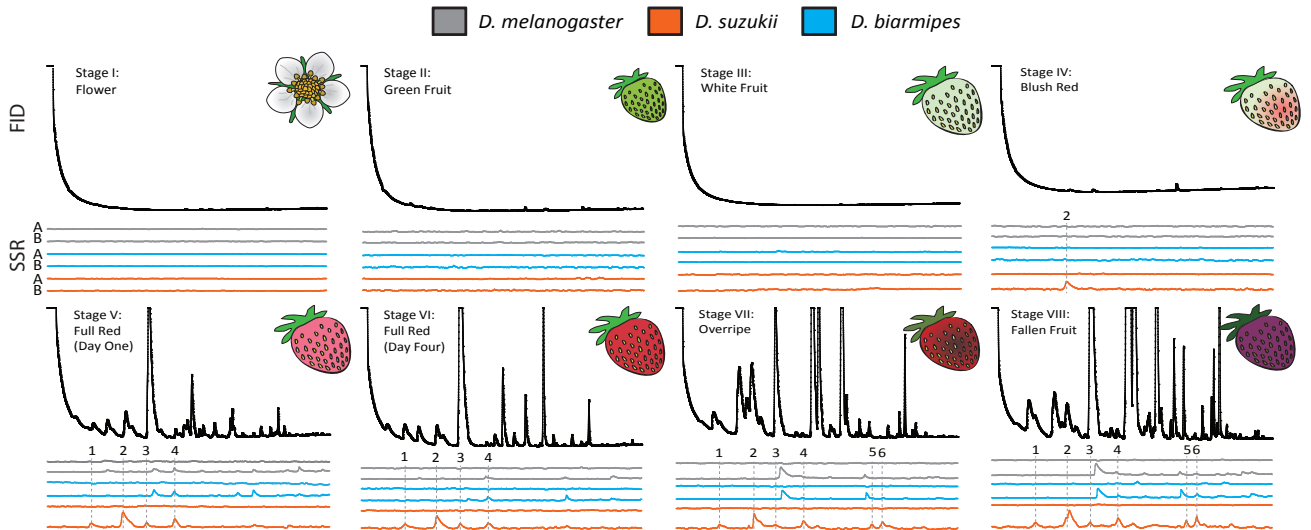

# C Trap assay with fruit compounds

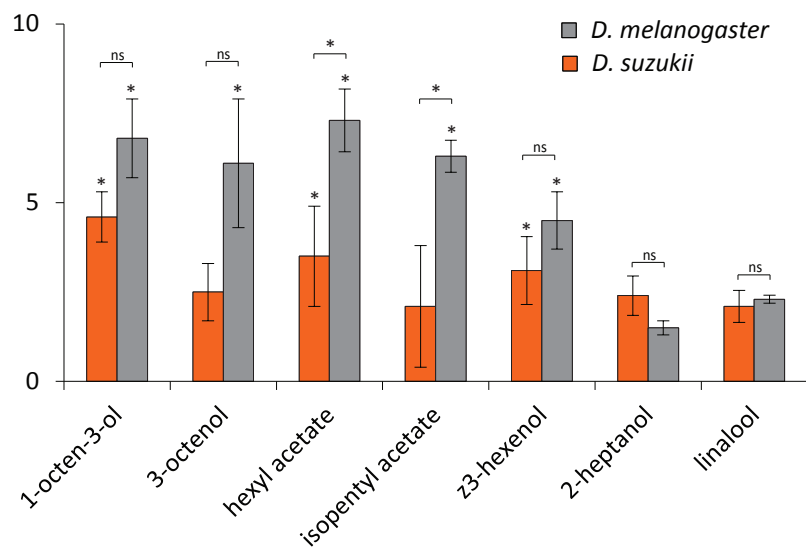

Supplement: 10886_2015_544_MOESM1_ESM.pdf [file 10886_2015_544_MOESM1_ESM.pdf]
