# Supplementary material for: Olfactory Specialization in Drosophila suzukii Supports an Ecological Shift in Host Preference from Rotten to Fresh Fruit
Source: PubMed Central journal article supplement (PMC4351439; doi:10.1007/s10886-015-0544-3), 2015-01-25

### A GC-EAD with Leaf Headspace

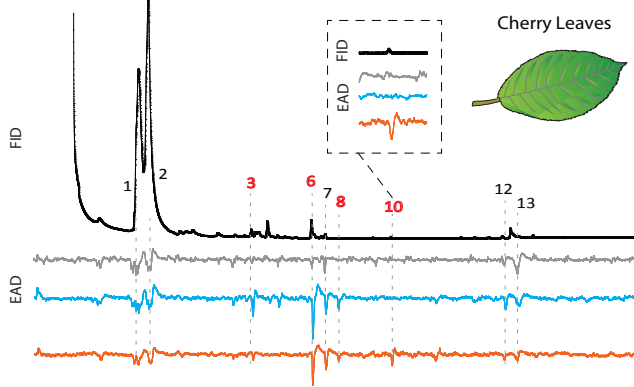

### B Additional leaves tested

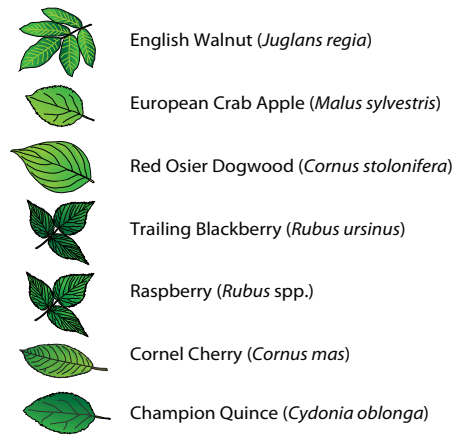

### C Behavior and GC-SSR using Stressed Leaf Tissue

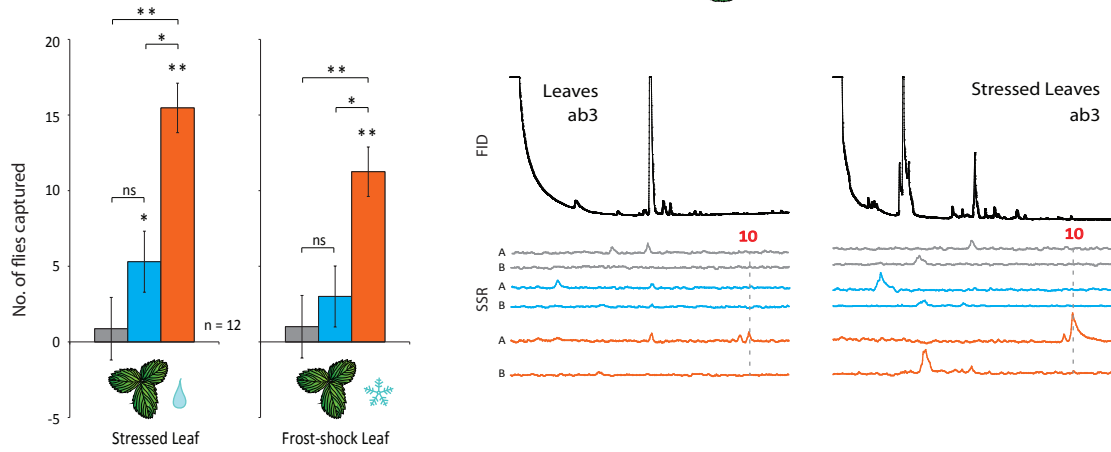

### D Behavior using Compounds Identified from Leaf Tissue or Fruit

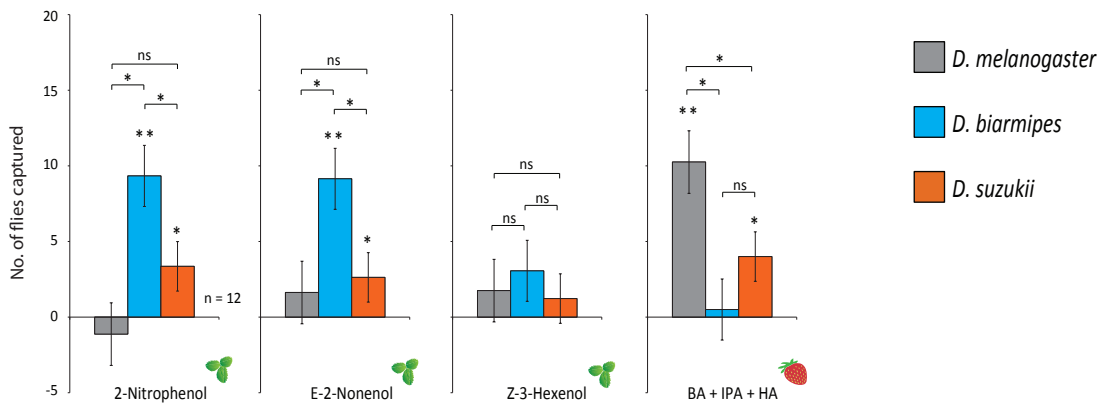

Supplement: 10886_2015_544_MOESM2_ESM.pdf [file 10886_2015_544_MOESM2_ESM.pdf]
